# Supplementary material for: mRNA mediates passive vaccination against infectious agents, toxins, and tumors
Source: PubMed Central journal article supplement (PMC5623855; doi:10.15252/emmm.201707678), 2017-08-09
Supplement: EMMM-9-1434-s001.pdf [file EMMM-9-1434-s001.pdf]

## Appendix

### mRNA mediates passive vaccination against infectious agents, toxins and tumors

Moritz Thran, Jean Mukherjee, Marion Pönisch, Katja Fiedler, Andreas Thess, Barbara L. Mui, Michael J. Hope, Ying K. Tam, Nigel Horscroft, Regina Heidenreich, Mariola Fotin-Mleczek, Charles B. Shoemaker, Thomas Schlake

This appendix includes 10 figures and 4 tables

|                                                                                                                                      | <b>Page</b> |
|--------------------------------------------------------------------------------------------------------------------------------------|-------------|
| <b>Table of Contents</b>                                                                                                             | 1           |
| <b>Appendix Figure S1.</b> Solitary heavy chain molecules are retained in the cytoplasm.                                             | 2           |
| <b>Appendix Figure S2.</b> Titration of the molar ratio of heavy and light chain-encoding mRNAs.                                     | 3           |
| <b>Appendix Figure S3.</b> Various mAbs can be expressed by exogenous mRNA <i>in vitro</i> .                                         | 4           |
| <b>Appendix Figure S4.</b> Kinetics of mRNA-LNP expression <i>in vitro</i> and <i>in vivo</i> .                                      | 5           |
| <b>Appendix Figure S5.</b> Cartoon illustration of the assay for measuring antigen-binding by mRNA-encoded mAbs.                     | 6           |
| <b>Appendix Figure S6.</b> Inhibition of HIV cell entry determined by a Magi R5-Tropic Antiviral Assay.                              | 7           |
| <b>Appendix Figure S7.</b> <i>In vivo</i> expression analyses of anti-influenza B mAb and VNAs.                                      | 8           |
| <b>Appendix Figure S8.</b> Correlation of IgG titers and ADA responses.                                                              | 9           |
| <b>Appendix Figure S9.</b> Histopathological analysis of liver sections after mRNA-LNP treatment.                                    | 10          |
| <b>Appendix Figure S10.</b> Protection of mice against BoNT/A challenge by mRNA-LNP administered at various times post intoxication. | 11          |
| <b>Appendix Table S1.</b> Analysis of cytokine induction following mRNA-LNP administration.                                          | 12          |
| <b>Appendix Table S2.</b> Supporting information Fig. 4b.                                                                            | 13          |
| <b>Appendix Table S3.</b> Supporting information Fig. 4d.                                                                            | 14          |
| <b>Appendix Table S4.</b> Supporting information Fig. 4e.                                                                            | 15-16       |

# Appendix Figure S1

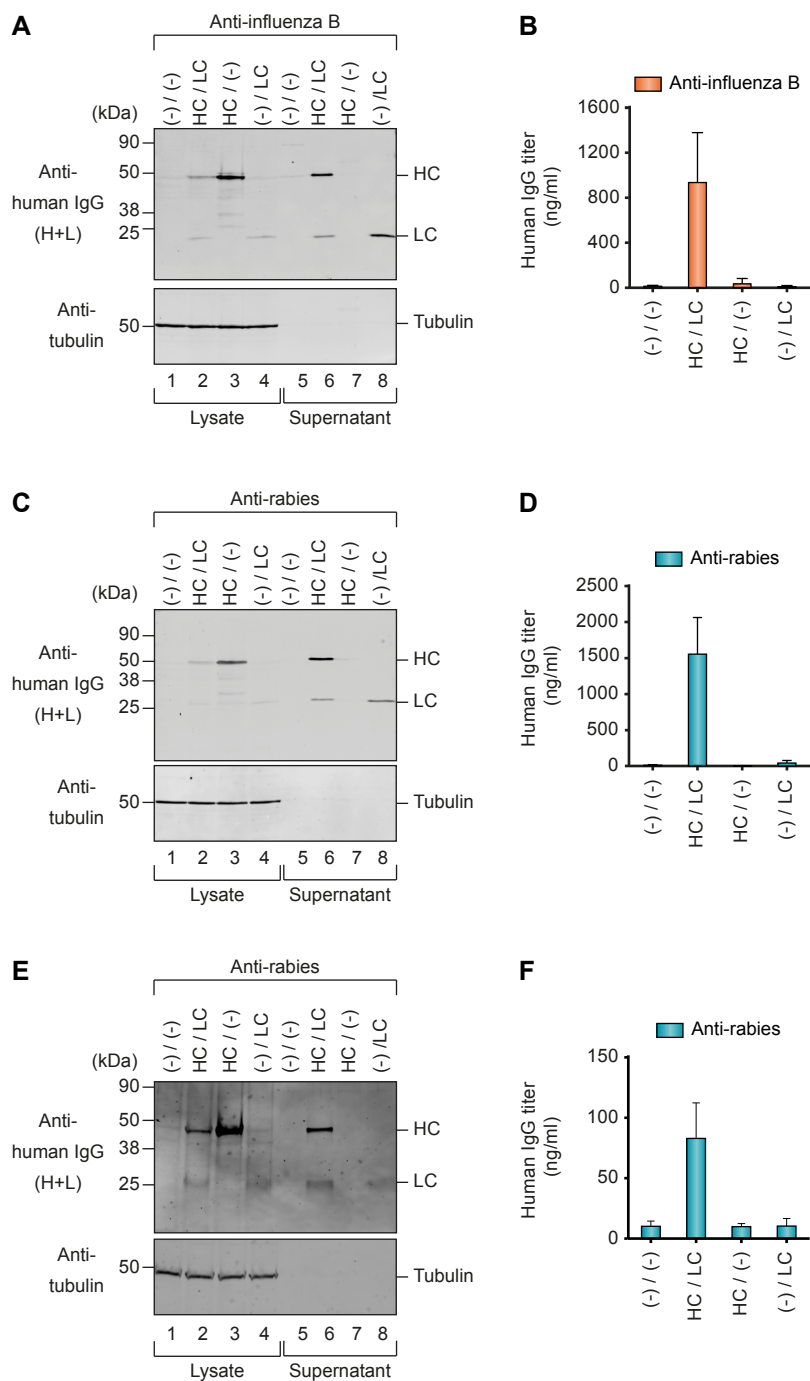

## Appendix Figure S1. Solitary heavy chain molecules are retained in the cytoplasm.

- A, C, E mRNAs encoding heavy chain (HC) and light chain (LC), respectively, were transfected in different combinations into BHK (A and C) or HepG2 (E) cells and expression profiles were analyzed from lysates and supernatants by western blot. Equal amounts of three replicates were pooled and loaded on denaturing SDS-PAGE followed by western blot analysis.
- B, D, F Individual supernatants (triplicates) that were pooled for (A), (C) and (E) were analyzed by IgG-specific ELISA. For mock co-transfections (indicated as (-)), an mRNA encoding eGFP was used.

Data information: Data in B, D and F are expressed as means  $\pm$  SD.

## Appendix Figure S2

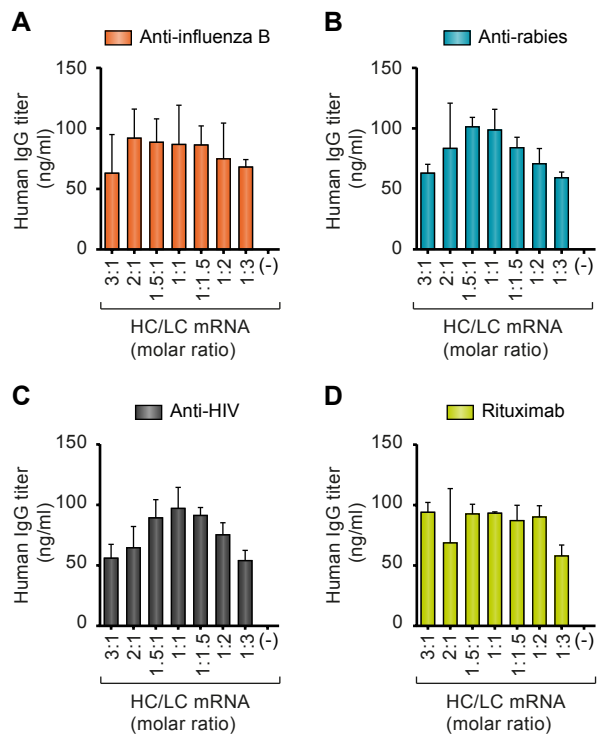

### Appendix Figure S2. Titration of the molar ratio of heavy and light chain-encoding mRNAs.

A, B, C, D      Quantification of mAb levels from BHK cell supernatants by IgG-specific ELISA. BHK cells were transfected with various ratios of heavy and light chain-encoding mRNAs giving rise to mAbs against influenza B (A), rabies (B), HIV (C), or human CD20 (D). Measurements were conducted in quadruplicate.

Data information: Data are expressed as means  $\pm$  SD.

## Appendix Figure S3

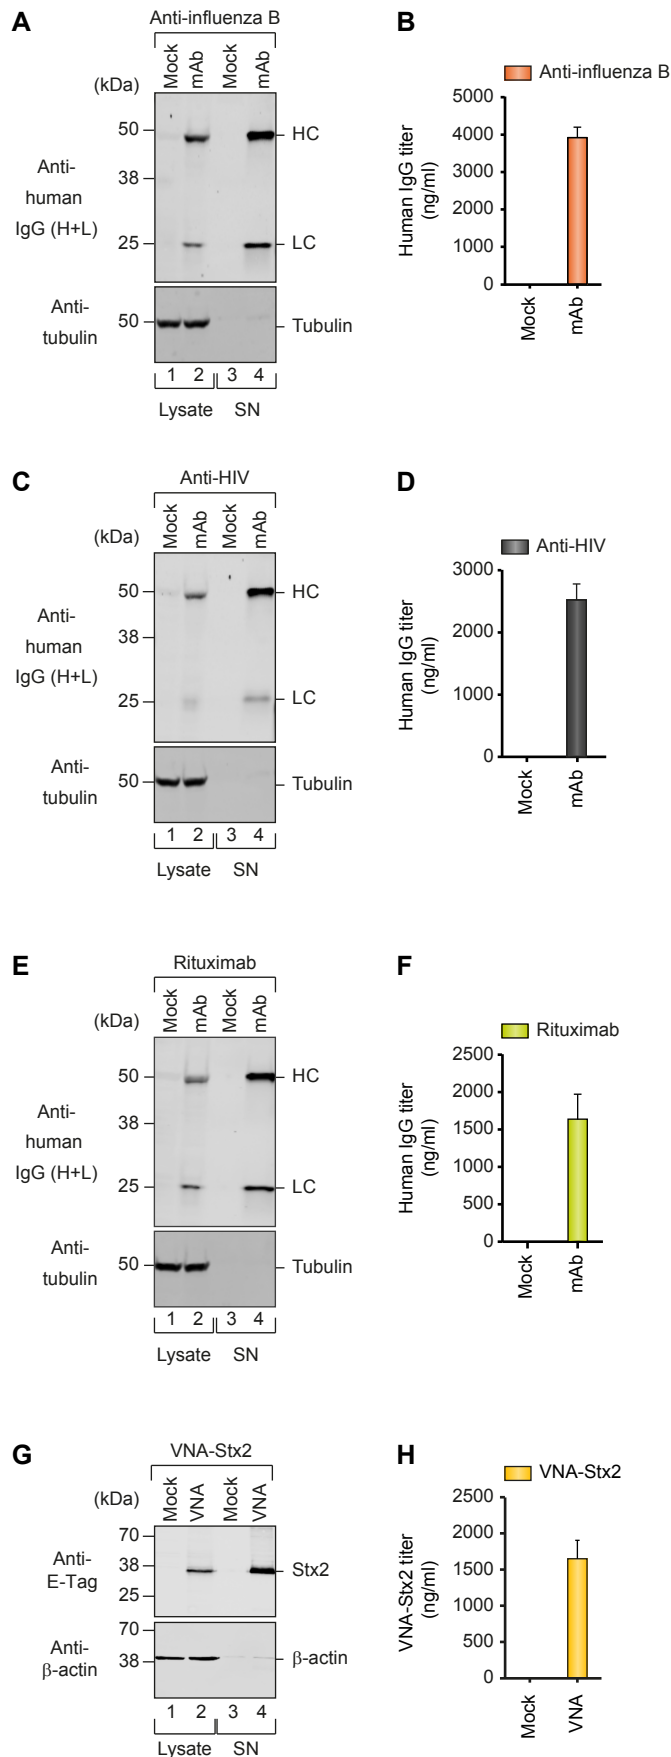

## Appendix Figure S3. Various antibodies can be expressed by exogenous mRNA in vitro.

- A, C, E, G mRNAs encoding distinct antibodies were transfected into BHK cells and expression was analyzed in lysates and supernatants by denaturing SDS-PAGE followed by western blot analysis. Equal amounts of three replicates were pooled for gel electrophoresis.
- B, D, F, H Quantification of titers from supernatants of BHK cells by IgG- (B, D, F) or antigen-specific ELISA (H). Titers were determined in biological triplicates.

Data information: Data in B, D, F and H are expressed as means  $\pm$  SD.

## Appendix Figure S4

**A**

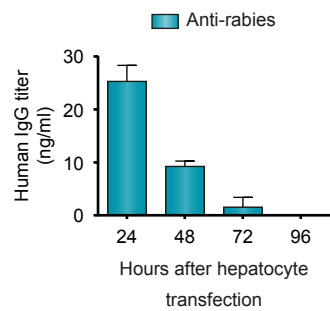

**B**

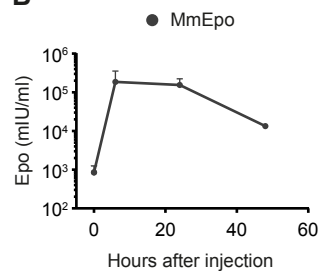

### Appendix Figure S4. Kinetics of mRNA-LNP expression in vitro and in vivo.

- A Primary mouse hepatocytes were transfected with mRNA-LNP encoding anti-rabies mAb. Expression of mAb at various times was determined in biological duplicates by IgG-specific ELISA.
- B Mice received 30  $\mu$ g of mRNA-LNP encoding MfEpo. Expression of MfEpo at various times was determined in biological duplicates by ELISA.

Data information: Data are expressed as means  $\pm$  SD.

## Appendix Figure S5

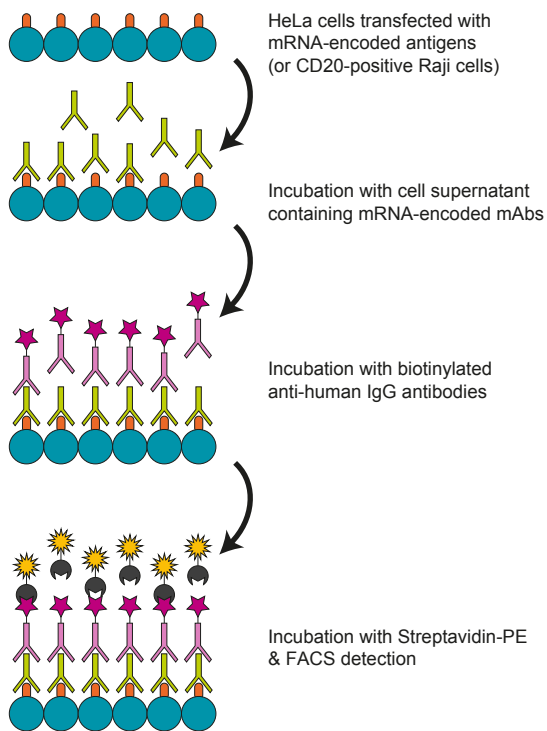

### Appendix Figure S5. Cartoon illustration of the assay for measuring antigen-binding by mRNA-encoded mAbs.

If no natural target cells were available, HeLa cells were transfected to express the cognate antigen of the mAb of interest. Following incubation with mAb-containing supernatants from BHK cells, HeLa or Raji cells were further incubated with anti-human IgG specific biotinylated antibody and finally incubated with streptavidin-coupled phycoerythrin (PE). Binding specificity correlates with PE intensity and can be assessed by semi-quantitative FACS analysis.

## Appendix Figure S6

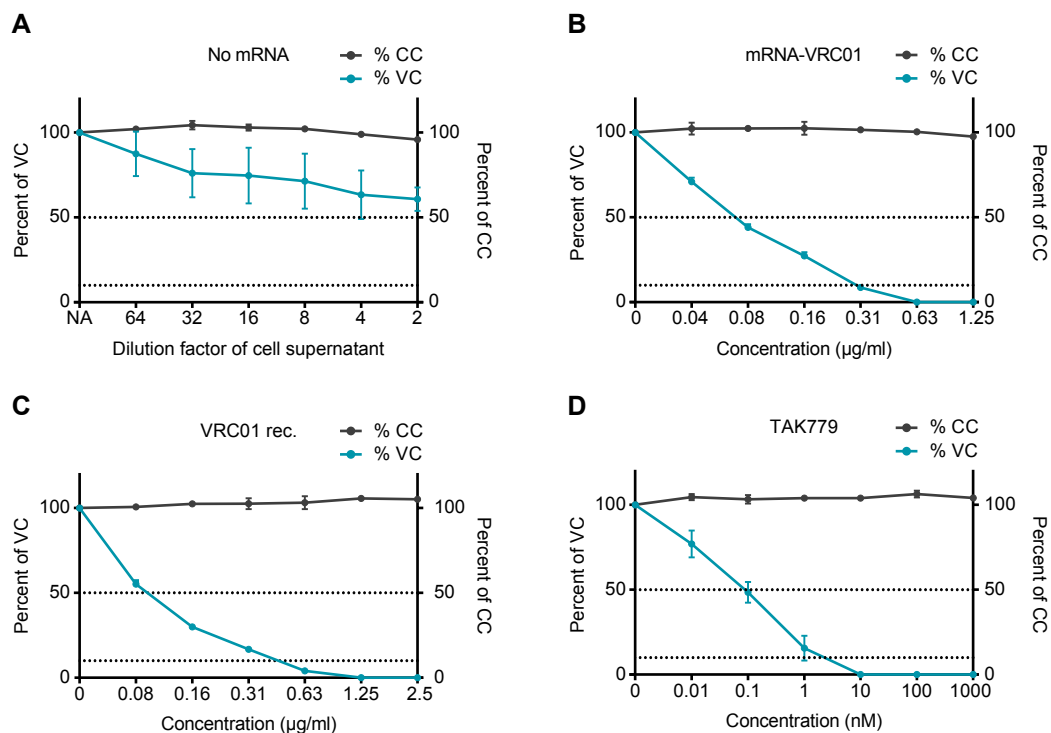

## Appendix Figure S6. Inhibition of HIV cell entry determined by a Magi R5-Tropic Antiviral Assay.

A, B, C, D

mRNA encoding VRC01 was transfected into BHK cells in triplicates. BHK supernatants were pooled and added to MAGI-R5 cells before Ba-L strain of HIV-1 was then added to the cells. Virus entry was measured via chemiluminescence. Depicted is the ratio of chemiluminescence compared to a virus control (VC) which represents infected cells in the absence of any test compound. Cell control (CC) measurements were carried out to analyze cell viability at different dilutions of medium in the absence of virus. A serial dilution of supernatants of untransfected cells (A), cells transfected with RNA encoding VRC01 (B), recombinant VRC01 (C) and the TAK779 inhibitor (D) was carried out and the virus entry was measured. Dotted lines indicate an inhibition of 50% ( $IC_{50}$ ) and of 90% ( $IC_{90}$ ) compared to virus control.

Data information: Data are expressed as means  $\pm$  SD.

## Appendix Figure S7

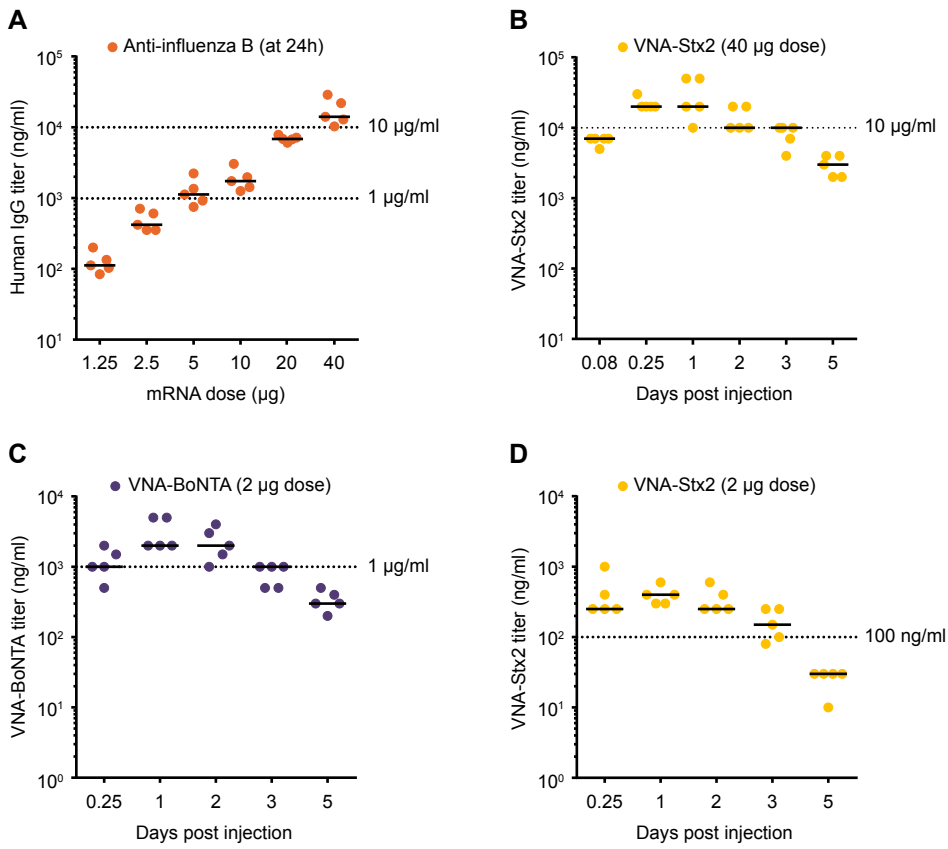

## Appendix Figure S7. In vivo expression analyses of anti-influenza B mAb and VNAs.

- A Quantification of mAb titers by IgG-specific ELISA of sera obtained 24 hours after a single intravenous injection of increasing doses of mRNA-LNP encoding anti-influenza B mAb into mice.
- B Quantification of VNA titers by antigen-specific ELISA at various times after a single intravenous injection of 40  $\mu\text{g}$  of mRNA-LNP encoding VNA-Stx2. For each time point, a different cohort of mice was used.
- C, D Quantification of VNA titers by antigen-specific ELISA at various times, following a single intravenous injection of 2  $\mu\text{g}$  of mRNA-LNP encoding either VNA-BoNTA or VNA-Stx2. For each time point a different cohort of mice was used.

Data information: Individual measurements as well as means are given for each time point.



## Appendix Figure S8

A

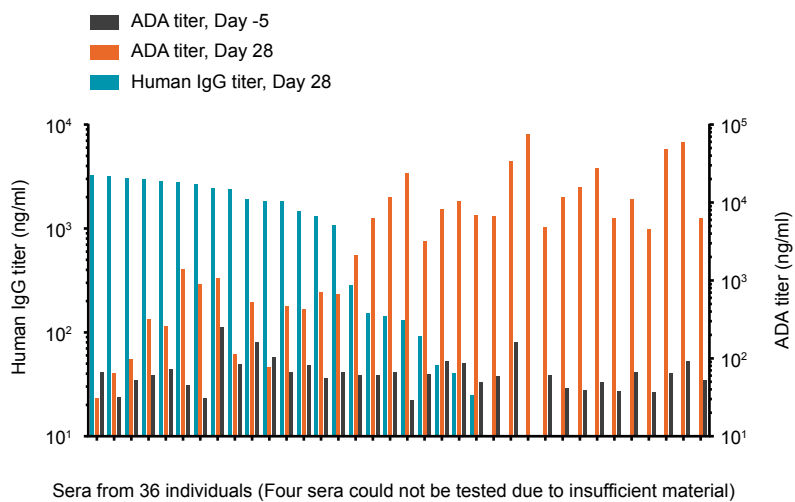

Correlation: Human IgG titer (Day 28) / ADA titer (Day 28)

Spearman r: - 0.8415

P (two tailed): < 0.0001

### Appendix Figure S8. Correlation of IgG titers and ADA responses.

All animals used for analysis of antibody expression kinetics (Fig. 3C) were bled on day 28 and antibody titers were determined using an IgG specific ELISA. ADA titers were determined by an ADA ELISA that specifically detects humoral responses against the anti-rabies antibody using day -5 (pre-bleed) and day 28 samples. Correlation of antibody and ADA titers was determined by two-tailed spearman correlation analysis.

Data information: Bars represent individual measurements.

## Appendix Figure S9

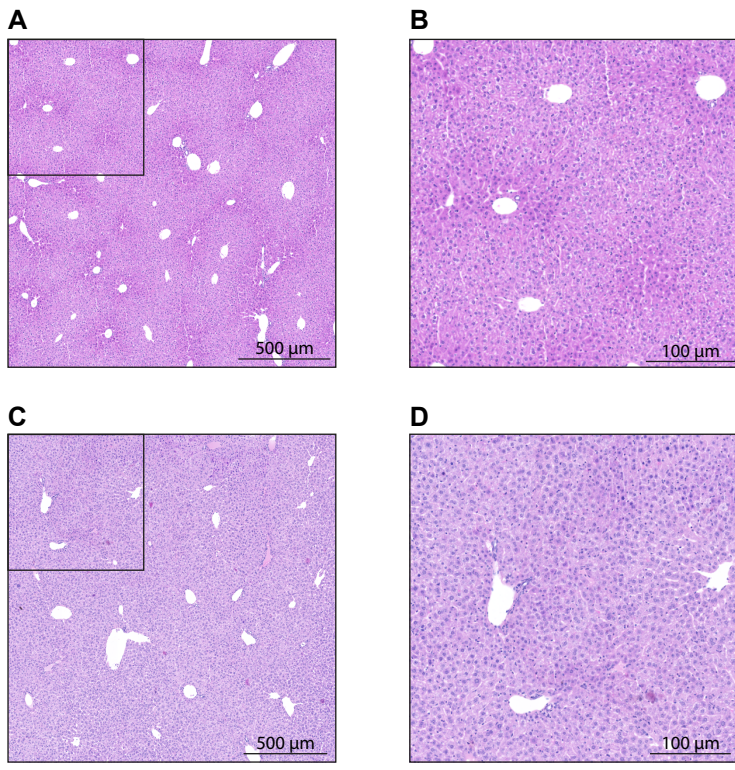

### Appendix Figure S9. Histopathological analysis of liver sections after mRNA-LNP treatment.

- A, B Histopathological analysis of liver sections of untreated mice at high (A) and low (B) magnification.
- C, D Histopathological analysis of liver sections of mice after mRNA-LNP treatment at high (C) and low (D) magnification.

## Appendix Figure S10

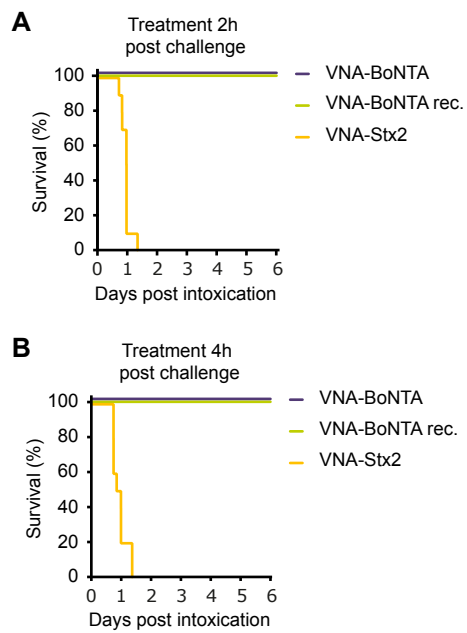

### Appendix Figure S10. Protection of mice against BoNT/A challenge by mRNA-LNP administered at various times post intoxication.

- A, B CD1 mice received a single intravenous injection of 2  $\mu$ g of recombinant VNA-BoNTA or 40  $\mu$ g of mRNA-LNP encoding either VNA-BoNTA or VNA-Stx2 at two (A) or four (B) hours after a lethal 4x LD50 intravenous BoNT/A challenge. Survival was monitored for six days. A total of ten mice per group were challenged.

## Appendix Table S1

Analysis of cytokine induction following mRNA-LNP administration

| mRNA-LNP dose    | 40 µg (2 mg/kg) |              |           |              |
|------------------|-----------------|--------------|-----------|--------------|
|                  | TNF             | IL-6         | GM-CSF    | IL-12p70     |
| Cytokine (pg/ml) |                 |              |           |              |
| Day -5           | 2,8 ± 1         | 1,9 ± 1      | 3,1 ± 6,1 | Not detected |
| 6 hours          | 80,9 ± 19,8     | 298,8 ± 92,1 | 8,9 ± 6,1 | Not detected |

## Appendix Table S2

Supporting information Fig. 4b

| Scores |                                                                                                                                                                               |
|--------|-------------------------------------------------------------------------------------------------------------------------------------------------------------------------------|
| 0      | no clinical signs                                                                                                                                                             |
| 1      | early sign of rabies encephalitis: ruffled fur, excessive grooming, restless / overly active, coordination problems (unsteady gait), blinking/squeezing of eyes, arched back  |
| 2      | progression to rabies encephalitis: ruffled fur, impaired use of one of the hind legs, inflexible tail, hunchback                                                             |
| 3      | rabies encephalitis ( <b>humane endpoint</b> ): impaired use of the hind quarter, rolls over when walking, inability to stand up, hunchback, inflexible tail / curled upwards |

| Body Weight (BW) |                                                                                                     |
|------------------|-----------------------------------------------------------------------------------------------------|
| < 90 % of Day 0  |                                                                                                     |
| < 85 % of Day 0  |                                                                                                     |
| < 80 % of Day 0  | Humane endpoint was also reached if the weight of mice reduced more than 5 % on two following days. |

| Mouse                        | Parameter | Day after Challenge |     |     |     |     |     |     |     |     |     |     |     |     |     |     |     |     |     |     |     |     |     |     |
|------------------------------|-----------|---------------------|-----|-----|-----|-----|-----|-----|-----|-----|-----|-----|-----|-----|-----|-----|-----|-----|-----|-----|-----|-----|-----|-----|
|                              |           | 0                   | 1   | 2   | 3   | 4   | 5   | 6   | 7   | 8   | 9   | 10  | 11  | 12  | 13  | 14  | 15  | 16  | 17  | 18  | 19  | 20  | 21  |     |
| Anti-rabies (40ug)<br>Day -1 | #1        | Score               | 0   | 0   | 0   | 0   | 0   | 0   | 0   | 0   | 0   | 0   | 0   | 0   | 0   | 0   | 0   | 0   | 0   | 0   | 0   | 0   | 0   |     |
|                              |           | BW                  | 100 | 100 | 108 | 108 | 108 | 106 | 105 | 107 | 112 | 114 | 112 | 111 | 113 | 114 | 116 | 118 | 120 | 119 | 121 | 122 | 120 | 119 |
|                              | #2        | Score               | 0   | 0   | 0   | 0   | 0   | 0   | 0   | 0   | 0   | 0   | 0   | 0   | 0   | 0   | 0   | 0   | 0   | 0   | 0   | 0   | 0   | 0   |
|                              |           | BW                  | 100 | 101 | 109 | 111 | 108 | 108 | 109 | 107 | 112 | 111 | 111 | 114 | 114 | 114 | 116 | 117 | 119 | 118 | 117 | 123 | 121 | 121 |
|                              | #3        | Score               | 0   | 0   | 0   | 0   | 0   | 0   | 1   | 0   | 0   | 0   | 0   | 0   | 0   | 0   | 0   | 0   | 0   | 0   | 0   | 0   | 0   | 0   |
|                              |           | BW                  | 100 | 101 | 108 | 108 | 109 | 107 | 108 | 110 | 115 | 114 | 113 | 116 | 115 | 115 | 116 | 118 | 117 | 116 | 119 | 120 | 116 | 113 |
|                              | #4        | Score               | 0   | 0   | 0   | 0   | 0   | 0   | 0   | 0   | 0   | 0   | 0   | 0   | 0   | 0   | 0   | 0   | 0   | 0   | 0   | 0   | 0   | 0   |
|                              |           | BW                  | 100 | 102 | 109 | 107 | 106 | 107 | 107 | 104 | 106 | 108 | 108 | 109 | 109 | 109 | 110 | 112 | 110 | 106 | 106 | 110 | 110 | 109 |
|                              | #5        | Score               | 0   | 0   | 0   | 1   | 0   | 1   | 1   | 1   | 1   | 1   | 2   | 1   | 1   | 1   | 1   | 1   | 1   | 1   | 1   | 1   | 1   | 1   |
|                              |           | BW                  | 100 | 101 | 110 | 104 | 101 | 101 | 98  | 97  | 104 | 104 | 101 | 104 | 104 | 108 | 107 | 107 | 108 | 107 | 107 | 109 | 113 | 113 |
|                              | #6        | Score               | 0   | 0   | 0   | 0   | 0   | 0   | 0   | 0   | 0   | 0   | 0   | 0   | 0   | 0   | 0   | 0   | 0   | 0   | 0   | 0   | 0   | 0   |
|                              |           | BW                  | 100 | 102 | 112 | 112 | 108 | 107 | 109 | 108 | 112 | 110 | 109 | 112 | 114 | 113 | 114 | 115 | 119 | 118 | 119 | 115 | 116 | 114 |

|                                   |    |       |     |     |     |     |     |     |     |     |     |     |     |     |     |     |     |     |     |     |     |     |     |
|-----------------------------------|----|-------|-----|-----|-----|-----|-----|-----|-----|-----|-----|-----|-----|-----|-----|-----|-----|-----|-----|-----|-----|-----|-----|
| Anti-influenza B (40ug)<br>Day -1 | #1 | Score | 0   | 0   | 0   | 0   | 0   | 0   | 0   | 1   | 3   | N/A | N/A | N/A | N/A | N/A | N/A | N/A | N/A | N/A | N/A | N/A | N/A |
|                                   |    | BW    | 100 | 99  | 105 | 109 | 109 | 107 | 108 | 100 | 94  | 87  | N/A | N/A | N/A | N/A | N/A | N/A | N/A | N/A | N/A | N/A | N/A |
|                                   | #2 | Score | 0   | 0   | 0   | 0   | 0   | 0   | 1   | 3   | N/A | N/A | N/A | N/A | N/A | N/A | N/A | N/A | N/A | N/A | N/A | N/A | N/A |
|                                   |    | BW    | 100 | 100 | 106 | 108 | 109 | 108 | 99  | 91  | N/A | N/A | N/A | N/A | N/A | N/A | N/A | N/A | N/A | N/A | N/A | N/A | N/A |
|                                   | #3 | Score | 0   | 0   | 0   | 0   | 0   | 1   | 2   | 3   | N/A | N/A | N/A | N/A | N/A | N/A | N/A | N/A | N/A | N/A | N/A | N/A | N/A |
|                                   |    | BW    | 100 | 101 | 107 | 112 | 109 | 98  | 90  | 81  | N/A | N/A | N/A | N/A | N/A | N/A | N/A | N/A | N/A | N/A | N/A | N/A | N/A |
|                                   | #4 | Score | 0   | 0   | 0   | 0   | 0   | 0   | 0   | 0   | 0   | 0   | 1   | 0   | 0   | 0   | 1   | 2   | 2   | N/A | N/A | N/A | N/A |
|                                   |    | BW    | 100 | 102 | 104 | 110 | 111 | 111 | 109 | 110 | 109 | 111 | 98  | 92  | 89  | 85  | 79  | 73  | 67  | N/A | N/A | N/A | N/A |
|                                   | #5 | Score | 0   | 0   | 0   | 0   | 0   | 1   | 2   | 3   | N/A | N/A | N/A | N/A | N/A | N/A | N/A | N/A | N/A | N/A | N/A | N/A | N/A |
|                                   |    | BW    | 100 | 98  | 106 | 107 | 106 | 95  | 86  | 79  | N/A | N/A | N/A | N/A | N/A | N/A | N/A | N/A | N/A | N/A | N/A | N/A | N/A |
|                                   | #6 | Score | 0   | 0   | 0   | 0   | 0   | 1   | 1   | 3   | N/A | N/A | N/A | N/A | N/A | N/A | N/A | N/A | N/A | N/A | N/A | N/A | N/A |
|                                   |    | BW    | 100 | 100 | 104 | 107 | 108 | 107 | 91  | 85  | N/A | N/A | N/A | N/A | N/A | N/A | N/A | N/A | N/A | N/A | N/A | N/A | N/A |

### Appendix Table S3

Supporting information Fig. 4d

| Scores |                                                                                                                                                                               |
|--------|-------------------------------------------------------------------------------------------------------------------------------------------------------------------------------|
| 0      | no clinical signs                                                                                                                                                             |
| 1      | early sign of rabies encephalitis: ruffled fur, excessive grooming, restless / overly active, coordination problems (unsteady gait), blinking/squeezing of eyes, arched back  |
| 2      | progression to rabies encephalitis: ruffled fur, impaired use of one of the hind legs, inflexible tail, hunchback                                                             |
| 3      | rabies encephalitis ( <b>humane endpoint</b> ): impaired use of the hind quarter, rolls over when walking, inability to stand up, hunchback, inflexible tail / curled upwards |

  

| Body Weight (BW) |                                                                                                     |
|------------------|-----------------------------------------------------------------------------------------------------|
| < 90 % of Day 0  |                                                                                                     |
| < 85 % of Day 0  |                                                                                                     |
| < 80 % of Day 0  | Humane endpoint was also reached if the weight of mice reduced more than 5 % on two following days. |

| Mouse                               | Parameter | Day after Challenge |     |    |     |     |     |     |     |     |     |     |     |     |     |     |     |     |     |     |     |     |     |     |  |  |
|-------------------------------------|-----------|---------------------|-----|----|-----|-----|-----|-----|-----|-----|-----|-----|-----|-----|-----|-----|-----|-----|-----|-----|-----|-----|-----|-----|--|--|
|                                     |           | 0                   | 1   | 2  | 3   | 4   | 5   | 6   | 7   | 8   | 9   | 10  | 11  | 12  | 13  | 14  | 15  | 16  | 17  | 18  | 19  | 20  | 21  |     |  |  |
| Anti-rabies (40ug)<br>+2 hours      | #1        | Score               | 0   | 0  | 0   | 0   | 0   | 0   | 0   | 0   | 0   | 0   | 0   | 0   | 0   | 0   | 0   | 0   | 0   | 0   | 0   | 0   | 0   |     |  |  |
|                                     |           | BW                  | 100 | 93 | 93  | 98  | 101 | 102 | 104 | 101 | 107 | 106 | 107 | 109 | 109 | 110 | 111 | 112 | 112 | 115 | 115 | 115 | 120 | 117 |  |  |
|                                     | #2        | Score               | 0   | 0  | 0   | 0   | 0   | 0   | 0   | 1   | 1   | 1   | 0   | 0   | 0   | 0   | 1   | 1   | 1   | 1   | 0   | 0   | 1   | 1   |  |  |
|                                     |           | BW                  | 100 | 95 | 96  | 103 | 100 | 100 | 97  | 91  | 92  | 100 | 101 | 106 | 102 | 108 | 106 | 104 | 102 | 103 | 102 | 103 | 104 | 104 |  |  |
|                                     | #3        | Score               | 0   | 0  | 0   | 0   | 0   | 0   | 0   | 1   | 0   | 0   | 0   | 0   | 0   | 0   | 0   | 0   | 0   | 0   | 0   | 0   | 0   | 0   |  |  |
|                                     |           | BW                  | 100 | 94 | 94  | 99  | 99  | 99  | 100 | 100 | 105 | 105 | 105 | 106 | 104 | 107 | 104 | 107 | 108 | 111 | 109 | 110 | 111 | 111 |  |  |
|                                     | #4        | Score               | 0   | 0  | 0   | 0   | 0   | 0   | 0   | 0   | 0   | 0   | 0   | 0   | 0   | 0   | 0   | 0   | 0   | 0   | 0   | 0   | 0   | 0   |  |  |
|                                     |           | BW                  | 100 | 96 | 100 | 104 | 106 | 104 | 106 | 101 | 103 | 103 | 101 | 102 | 101 | 104 | 102 | 102 | 101 | 103 | 103 | 104 | 105 | 106 |  |  |
|                                     | #5        | Score               | 0   | 0  | 0   | 0   | 0   | 0   | 0   | 0   | 0   | 0   | 0   | 0   | 0   | 0   | 0   | 0   | 0   | 0   | 0   | 0   | 0   | 0   |  |  |
|                                     |           | BW                  | 100 | 95 | 96  | 99  | 101 | 98  | 98  | 100 | 102 | 102 | 103 | 103 | 103 | 103 | 102 | 105 | 104 | 105 | 108 | 108 | 111 | 111 |  |  |
|                                     | #6        | Score               | 0   | 0  | 0   | 0   | 0   | 0   | 0   | 1   | 0   | 0   | 0   | 0   | 0   | 0   | 0   | 0   | 0   | 0   | 0   | 0   | 0   | 0   |  |  |
|                                     |           | BW                  | 100 | 94 | 96  | 100 | 97  | 96  | 97  | 96  | 101 | 99  | 99  | 102 | 100 | 102 | 100 | 102 | 101 | 103 | 107 | 105 | 107 | 105 |  |  |
| Anti-influenza B (40ug)<br>+2 hours | #1        | Score               | 0   | 0  | 0   | 0   | 0   | 2   | 3   | N/A |     |     |     |     |     |     |     |     |     |     |     |     |     |     |  |  |
|                                     |           | BW                  | 100 | 97 | 98  | 103 | 103 | 94  | 87  | N/A |     |     |     |     |     |     |     |     |     |     |     |     |     |     |  |  |
|                                     | #2        | Score               | 0   | 0  | 0   | 0   | 0   | 1   | 2   | 2   | 2   | N/A |     |     |     |     |     |     |     |     |     |     |     |     |  |  |
|                                     |           | BW                  | 100 | 93 | 96  | 100 | 96  | 93  | 84  | 76  | 71  | N/A |     |     |     |     |     |     |     |     |     |     |     |     |  |  |
|                                     | #3        | Score               | 0   | 0  | 0   | 0   | 0   | 0   | 0   | 1   | 0   | 0   | 1   | 0   | 1   | 1   | 1   | 1   | 1   | 1   | 1   | 1   | 1   | 1   |  |  |
|                                     |           | BW                  | 100 | 90 | 91  | 97  | 100 | 100 | 101 | 101 | 105 | 100 | 90  | 86  | 85  | 86  | 85  | 84  | 85  | 84  | 85  | 93  | 91  | 93  |  |  |
|                                     | #4        | Score               | 0   | 0  | 0   | 0   | 0   | 1   | 3   | N/A |     |     |     |     |     |     |     |     |     |     |     |     |     |     |  |  |
|                                     |           | BW                  | 100 | 94 | 94  | 100 | 100 | 88  | 82  | N/A |     |     |     |     |     |     |     |     |     |     |     |     |     |     |  |  |
|                                     | #5        | Score               | 0   | 0  | 0   | 0   | 0   | 0   | 1   | 0   | 0   | 0   | 0   | 0   | 0   | 0   | 0   | 0   | 0   | 0   | 0   | 0   | 0   | 0   |  |  |
|                                     |           | BW                  | 100 | 96 | 95  | 100 | 101 | 100 | 99  | 98  | 101 | 101 | 99  | 99  | 98  | 97  | 100 | 100 | 102 | 101 | 103 | 104 | 102 | 102 |  |  |
|                                     | #6        | Score               | 0   | 0  | 0   | 0   | 0   | 1   | 2   | 3   | N/A |     |     |     |     |     |     |     |     |     |     |     |     |     |  |  |
|                                     |           | BW                  | 100 | 95 | 97  | 100 | 101 | 95  | 89  | 83  | N/A |     |     |     |     |     |     |     |     |     |     |     |     |     |  |  |

# Appendix Table S4

Supporting information Fig. 4e

| Scores |                                                                                                                                                                               |
|--------|-------------------------------------------------------------------------------------------------------------------------------------------------------------------------------|
| 0      | no clinical signs                                                                                                                                                             |
| 1      | early sign of rabies encephalitis: ruffled fur, excessive grooming, restless / overly active, coordination problems (unsteady gait), blinking/squeezing of eyes, arched back  |
| 2      | progression to rabies encephalitis: ruffled fur, impaired use of one of the hind legs, inflexible tail, hunchback                                                             |
| 3      | rabies encephalitis ( <b>humane endpoint</b> ): impaired use of the hind quarter, rolls over when walking, inability to stand up, hunchback, inflexible tail / curled upwards |

| Body Weight (BW) |                                                                                                     |
|------------------|-----------------------------------------------------------------------------------------------------|
| < 90 % of Day 0  |                                                                                                     |
| < 85 % of Day 0  |                                                                                                     |
| < 80 % of Day 0  | Humane endpoint was also reached if the weight of mice reduced more than 5 % on two following days. |

| Mouse                           | Parameter | Day after Challenge |     |    |     |     |     |     |     |     |     |     |     |     |     |     |     |     |     |     |     |     |     |     |
|---------------------------------|-----------|---------------------|-----|----|-----|-----|-----|-----|-----|-----|-----|-----|-----|-----|-----|-----|-----|-----|-----|-----|-----|-----|-----|-----|
|                                 |           | 0                   | 1   | 2  | 3   | 4   | 5   | 6   | 7   | 8   | 9   | 10  | 11  | 12  | 13  | 14  | 15  | 16  | 17  | 18  | 19  | 20  | 21  |     |
| Anti-rabies<br>(40 µg mRNA-LNP) | #1        | Score               | 0   | 0  | 0   | 0   | 0   | 0   | 0   | 0   | 0   | 0   | 0   | 0   | 0   | 0   | 0   | 0   | 0   | 0   | 0   | 0   | 0   | 0   |
|                                 |           | BW                  | 100 | 96 | 96  | 95  | 95  | 95  | 95  | 95  | 95  | 97  | 94  | 95  | 96  | 97  | 97  | 100 | 100 | 99  | 97  | 96  | 97  | 98  |
|                                 | #2        | Score               | 0   | 0  | 0   | 0   | 0   | 0   | 0   | 0   | 0   | 0   | 0   | 0   | 0   | 0   | 0   | 0   | 0   | 0   | 0   | 0   | 0   | 0   |
|                                 |           | BW                  | 100 | 95 | 94  | 99  | 97  | 96  | 94  | 95  | 95  | 98  | 99  | 100 | 100 | 103 | 105 | 109 | 110 | 107 | 103 | 102 | 104 | 107 |
|                                 | #3        | Score               | 0   | 0  | 0   | 0   | 0   | 0   | 0   | 0   | 0   | 0   | 0   | 0   | 0   | 0   | 0   | 0   | 0   | 0   | 0   | 0   | 0   | 0   |
|                                 |           | BW                  | 100 | 96 | 97  | 101 | 102 | 99  | 99  | 98  | 97  | 100 | 98  | 98  | 100 | 98  | 98  | 100 | 102 | 104 | 103 | 105 | 106 | 105 |
|                                 | #4        | Score               | 0   | 0  | 0   | 0   | 0   | 0   | 0   | 0   | 0   | 0   | 1   | 1   | 1   | 1   | 1   | 1   | 0   | 0   | 0   | 0   | 0   | 0   |
|                                 |           | BW                  | 100 | 96 | 101 | 104 | 104 | 97  | 96  | 96  | 95  | 99  | 96  | 96  | 99  | 99  | 102 | 100 | 102 | 103 | 102 | 104 | 106 | 106 |
|                                 | #5        | Score               | 0   | 0  | 0   | 0   | 0   | 0   | 0   | 0   | 0   | 0   | 0   | 0   | 0   | 0   | 0   | 0   | 0   | 0   | 0   | 0   | 0   | 0   |
|                                 |           | BW                  | 100 | 88 | 89  | 94  | 97  | 99  | 99  | 99  | 98  | 103 | 104 | 101 | 104 | 106 | 109 | 110 | 109 | 111 | 107 | 105 | 106 | 99  |
|                                 | #6        | Score               | 0   | 0  | 0   | 0   | 0   | 0   | 0   | 1   | 1   | 1   | 1   | 1   | 1   | 1   | 1   | 2   | 2   | 1   | 1   | 1   | 1   | 1   |
|                                 |           | BW                  | 100 | 98 | 101 | 102 | 95  | 93  | 90  | 90  | 89  | 87  | 88  | 89  | 90  | 95  | 95  | 93  | 95  | 97  | 95  | 96  | 100 | 98  |
|                                 | #7        | Score               | 0   | 0  | 0   | 0   | 0   | 0   | 0   | 0   | 0   | 0   | 0   | 0   | 0   | 0   | 0   | 0   | 0   | 0   | 0   | 0   | 0   | 0   |
|                                 |           | BW                  | 100 | 93 | 96  | 97  | 93  | 95  | 88  | 89  | 90  | 91  | 92  | 89  | 89  | 91  | 93  | 93  | 96  | 96  | 95  | 99  | 100 | 97  |
|                                 | #8        | Score               | 0   | 0  | 0   | 0   | 0   | 0   | 0   | 0   | 0   | 0   | 0   | 0   | 0   | 0   | 0   | 0   | 0   | 0   | 0   | 0   | 0   | 0   |
|                                 |           | BW                  | 100 | 96 | 98  | 100 | 101 | 102 | 101 | 103 | 102 | 101 | 102 | 102 | 103 | 105 | 107 | 104 | 106 | 106 | 108 | 112 | 112 | 109 |

|                                      |    |       |     |    |    |     |     |    |    |     |     |     |     |     |     |     |     |     |     |     |     |     |     |     |
|--------------------------------------|----|-------|-----|----|----|-----|-----|----|----|-----|-----|-----|-----|-----|-----|-----|-----|-----|-----|-----|-----|-----|-----|-----|
| Anti-influenza B<br>(40 µg mRNA-LNP) | #1 | Score | 0   | 0  | 0  | 0   | 0   | 0  | 3  | N/A | N/A | N/A | N/A | N/A | N/A | N/A | N/A | N/A | N/A | N/A | N/A | N/A | N/A |     |
|                                      |    | BW    | 100 | 93 | 91 | 97  | 99  | 88 | 82 |     |     |     |     |     |     |     |     |     |     |     |     |     |     |     |
|                                      | #2 | Score | 0   | 0  | 0  | 0   | 0   | 0  | 0  | 0   | 0   | 0   | 0   | 0   | 0   | 0   | 0   | 0   | 0   | 0   | 0   | 0   | 0   |     |
|                                      |    | BW    | 100 | 98 | 97 | 98  | 98  | 96 | 98 | 99  | 98  | 98  | 96  | 97  | 98  | 96  | 95  | 93  | 92  | 98  | 99  | 99  | 100 | 99  |
|                                      | #3 | Score | 0   | 0  | 0  | 0   | 0   | 0  | 2  | 3   | N/A | N/A | N/A | N/A | N/A | N/A | N/A | N/A | N/A | N/A | N/A | N/A | N/A | N/A |
|                                      |    | BW    | 100 | 95 | 98 | 102 | 102 | 93 | 89 | 82  |     |     |     |     |     |     |     |     |     |     |     |     |     |     |
|                                      | #4 | Score | 0   | 0  | 0  | 0   | 0   | 0  | 1  | 2   | N/A | N/A | N/A | N/A | N/A | N/A | N/A | N/A | N/A | N/A | N/A | N/A | N/A | N/A |
|                                      |    | BW    | 100 | 92 | 92 | 96  | 96  | 96 | 89 | 80  | 72  |     |     |     |     |     |     |     |     |     |     |     |     |     |
|                                      | #5 | Score | 0   | 0  | 0  | 0   | 0   | 0  | 2  | 3   | N/A | N/A | N/A | N/A | N/A | N/A | N/A | N/A | N/A | N/A | N/A | N/A | N/A | N/A |
|                                      |    | BW    | 100 | 96 | 97 | 97  | 98  | 92 | 86 | 80  |     |     |     |     |     |     |     |     |     |     |     |     |     |     |
|                                      | #6 | Score | 0   | 0  | 0  | 0   | 0   | 1  | 2  | N/A | N/A | N/A | N/A | N/A | N/A | N/A | N/A | N/A | N/A | N/A | N/A | N/A | N/A | N/A |
|                                      |    | BW    | 100 | 93 | 93 | 92  | 95  | 87 | 81 |     |     |     |     |     |     |     |     |     |     |     |     |     |     |     |
|                                      | #7 | Score | 0   | 0  | 0  | 0   | 0   | 0  | 2  | 3   | N/A | N/A | N/A | N/A | N/A | N/A | N/A | N/A | N/A | N/A | N/A | N/A | N/A | N/A |
|                                      |    | BW    | 100 | 93 | 93 | 94  | 94  | 88 | 81 | 76  |     |     |     |     |     |     |     |     |     |     |     |     |     |     |
|                                      | #8 | Score | 0   | 0  | 0  | 0   | 0   | 0  | 2  | 3   | N/A | N/A | N/A | N/A | N/A | N/A | N/A | N/A | N/A | N/A | N/A | N/A | N/A | N/A |
|                                      |    | BW    | 100 | 94 | 91 | 92  | 91  | 82 | 78 | 74  |     |     |     |     |     |     |     |     |     |     |     |     |     |     |

Appendix Table S4 continued

Supporting information Fig. 4e

| Scores |                                                                                                                                                                               |
|--------|-------------------------------------------------------------------------------------------------------------------------------------------------------------------------------|
| 0      | no clinical signs                                                                                                                                                             |
| 1      | early sign of rabies encephalitis: ruffled fur, excessive grooming, restless / overly active, coordination problems (unsteady gait), blinking/squeezing of eyes, arched back  |
| 2      | progression to rabies encephalitis: ruffled fur, impaired use of one of the hind legs, inflexible tail, hunchback                                                             |
| 3      | rabies encephalitis ( <b>humane endpoint</b> ): impaired use of the hind quarter, rolls over when walking, inability to stand up, hunchback, inflexible tail / curled upwards |

  

| Body Weight (BW) |                                                                                                     |
|------------------|-----------------------------------------------------------------------------------------------------|
| < 90 % of Day 0  |                                                                                                     |
| < 85 % of Day 0  |                                                                                                     |
| < 80 % of Day 0  | Humane endpoint was also reached if the weight of mice reduced more than 5 % on two following days. |

| Mouse | Parameter | Day after Challenge |     |     |     |     |     |     |     |     |     |     |     |     |     |     |     |     |     |     |     |     |     |
|-------|-----------|---------------------|-----|-----|-----|-----|-----|-----|-----|-----|-----|-----|-----|-----|-----|-----|-----|-----|-----|-----|-----|-----|-----|
|       |           | 0                   | 1   | 2   | 3   | 4   | 5   | 6   | 7   | 8   | 9   | 10  | 11  | 12  | 13  | 14  | 15  | 16  | 17  | 18  | 19  | 20  | 21  |
| #1    | Score     | 0                   | 0   | 0   | 0   | 0   | 0   | 0   | 0   | 0   | 0   | 0   | 0   | 0   | 0   | 0   | 0   | 0   | 0   | 0   | 0   | 0   | 0   |
|       | BW        | 100                 | 97  | 99  | 100 | 100 | 98  | 100 | 100 | 99  | 100 | 99  | 103 | 102 | 101 | 103 | 105 | 103 | 105 | 107 | 106 | 109 | 107 |
| #2    | Score     | 0                   | 0   | 0   | 0   | 0   | 0   | 0   | 0   | 0   | 0   | 0   | 0   | 0   | 0   | 0   | 0   | 0   | 0   | 0   | 0   | 0   | 0   |
|       | BW        | 94                  | 94  | 95  | 95  | 95  | 94  | 94  | 97  | 96  | 97  | 97  | 100 | 100 | 100 | 99  | 97  | 96  | 97  | 98  | 97  | 99  | 100 |
| #3    | Score     | 0                   | 0   | 0   | 0   | 0   | 0   | 2   | 3   | N/A | N/A | N/A | N/A | N/A | N/A | N/A | N/A | N/A | N/A | N/A | N/A | N/A | N/A |
|       | BW        | 101                 | 100 | 102 | 95  | 94  | 86  | 83  | 76  | N/A | N/A | N/A | N/A | N/A | N/A | N/A | N/A | N/A | N/A | N/A | N/A | N/A | N/A |
| #4    | Score     | 0                   | 0   | 0   | 0   | 0   | 0   | 0   | 0   | 0   | 0   | 0   | 0   | 0   | 0   | 0   | 0   | 0   | 0   | 0   | 0   | 0   | 0   |
|       | BW        | 96                  | 93  | 100 | 100 | 99  | 93  | 95  | 98  | 97  | 95  | 93  | 95  | 96  | 94  | 97  | 99  | 99  | 100 | 99  | 100 | 97  | 95  |
| #5    | Score     | 0                   | 0   | 0   | 0   | 0   | 1   | 3   | 3   | N/A | N/A | N/A | N/A | N/A | N/A | N/A | N/A | N/A | N/A | N/A | N/A | N/A | N/A |
|       | BW        | 101                 | 101 | 100 | 99  | 96  | 91  | 85  | 76  | N/A | N/A | N/A | N/A | N/A | N/A | N/A | N/A | N/A | N/A | N/A | N/A | N/A | N/A |
| #6    | Score     | 0                   | 0   | 0   | 0   | 0   | 0   | 0   | 0   | 0   | 0   | 0   | 0   | 0   | 0   | 0   | 0   | 0   | 0   | 0   | 0   | 0   | 0   |
|       | BW        | 100                 | 97  | 100 | 101 | 102 | 101 | 102 | 103 | 102 | 102 | 101 | 100 | 102 | 103 | 102 | 104 | 104 | 104 | 102 | 104 | 104 | 103 |
| #7    | Score     | 0                   | 0   | 0   | 0   | 0   | 2   | 3   | N/A | N/A | N/A | N/A | N/A | N/A | N/A | N/A | N/A | N/A | N/A | N/A | N/A | N/A | N/A |
|       | BW        | 99                  | 96  | 96  | 99  | 98  | 91  | 84  | N/A | N/A | N/A | N/A | N/A | N/A | N/A | N/A | N/A | N/A | N/A | N/A | N/A | N/A | N/A |
| #8    | Score     | 0                   | 0   | 0   | 0   | 0   | 0   | 0   | 0   | 0   | 0   | 0   | 0   | 0   | 0   | 0   | 1   | 1   | 0   | 0   | 0   | 0   | 0   |
|       | BW        | 101                 | 96  | 99  | 100 | 103 | 102 | 103 | 103 | 104 | 103 | 103 | 101 | 103 | 104 | 104 | 105 | 105 | 105 | 104 | 105 | 104 | 104 |

|    |       |     |     |     |     |     |     |    |     |     |     |     |     |     |     |     |     |     |     |     |     |     |     |
|----|-------|-----|-----|-----|-----|-----|-----|----|-----|-----|-----|-----|-----|-----|-----|-----|-----|-----|-----|-----|-----|-----|-----|
| #1 | Score | 0   | 0   | 0   | 0   | 0   | 1   | 3  | N/A | N/A | N/A | N/A | N/A | N/A | N/A | N/A | N/A | N/A | N/A | N/A | N/A | N/A | N/A |
|    | BW    | 100 | 100 | 100 | 103 | 103 | 98  | 93 | N/A | N/A | N/A | N/A | N/A | N/A | N/A | N/A | N/A | N/A | N/A | N/A | N/A | N/A | N/A |
| #2 | Score | 0   | 0   | 0   | 0   | 0   | 1   | 3  | N/A | N/A | N/A | N/A | N/A | N/A | N/A | N/A | N/A | N/A | N/A | N/A | N/A | N/A | N/A |
|    | BW    | 100 | 96  | 94  | 96  | 94  | 85  | 78 | N/A | N/A | N/A | N/A | N/A | N/A | N/A | N/A | N/A | N/A | N/A | N/A | N/A | N/A | N/A |
| #3 | Score | 0   | 0   | 0   | 0   | 0   | 0   | 0  | 0   | 0   | 0   | 0   | 0   | 0   | 1   | 0   | 0   | 0   | 0   | 1   | 0   | 1   | 0   |
|    | BW    | 100 | 95  | 97  | 99  | 98  | 95  | 95 | 95  | 94  | 94  | 95  | 87  | 88  | 90  | 86  | 85  | 86  | 90  | 94  | 95  | 95  | 97  |
| #4 | Score | 0   | 0   | 0   | 0   | 0   | 1   | 3  | N/A | N/A | N/A | N/A | N/A | N/A | N/A | N/A | N/A | N/A | N/A | N/A | N/A | N/A | N/A |
|    | BW    | 100 | 98  | 101 | 104 | 103 | 89  | 84 | N/A | N/A | N/A | N/A | N/A | N/A | N/A | N/A | N/A | N/A | N/A | N/A | N/A | N/A | N/A |
| #5 | Score | 0   | 0   | 0   | 0   | 0   | 1   | 2  | 3   | N/A | N/A | N/A | N/A | N/A | N/A | N/A | N/A | N/A | N/A | N/A | N/A | N/A | N/A |
|    | BW    | 100 | 96  | 99  | 98  | 97  | 86  | 81 | 73  | N/A | N/A | N/A | N/A | N/A | N/A | N/A | N/A | N/A | N/A | N/A | N/A | N/A | N/A |
| #6 | Score | 0   | 0   | 0   | 0   | 0   | 0   | 0  | 0   | 0   | 0   | 0   | 0   | 0   | 0   | 0   | 0   | 0   | 0   | 0   | 0   | 0   | 0   |
|    | BW    | 100 | 97  | 100 | 102 | 101 | 100 | 99 | 95  | 96  | 97  | 96  | 95  | 97  | 95  | 99  | 101 | 101 | 100 | 101 | 100 | 101 | 102 |
| #7 | Score | 0   | 0   | 0   | 0   | 0   | 2   | 3  | N/A | N/A | N/A | N/A | N/A | N/A | N/A | N/A | N/A | N/A | N/A | N/A | N/A | N/A | N/A |
|    | BW    | 100 | 100 | 103 | 103 | 102 | 95  | 88 | 80  | N/A | N/A | N/A | N/A | N/A | N/A | N/A | N/A | N/A | N/A | N/A | N/A | N/A | N/A |
| #8 | Score | 0   | 0   | 0   | 0   | 0   | 0   | 0  | 0   | 0   | 0   | 0   | 0   | 0   | 1   | 0   | 0   | 0   | 0   | 0   | 0   | 0   | 0   |
|    | BW    | 100 | 101 | 101 | 99  | 96  | 97  | 99 | 97  | 97  | 94  | 92  | 92  | 96  | 95  | 98  | 100 | 103 | 103 | 102 | 102 | 103 | 106 |

|    |       |     |     |     |     |     |    |     |     |     |     |     |     |     |     |     |     |     |     |     |     |     |     |
|----|-------|-----|-----|-----|-----|-----|----|-----|-----|-----|-----|-----|-----|-----|-----|-----|-----|-----|-----|-----|-----|-----|-----|
| #1 | Score | 0   | 0   | 0   | 0   | 0   | 1  | 3   | N/A | N/A | N/A | N/A | N/A | N/A | N/A | N/A | N/A | N/A | N/A | N/A | N/A | N/A | N/A |
|    | BW    | 100 | 98  | 96  | 96  | 94  | 83 | 78  | N/A | N/A | N/A | N/A | N/A | N/A | N/A | N/A | N/A | N/A | N/A | N/A | N/A | N/A | N/A |
| #2 | Score | 0   | 0   | 0   | 0   | 0   | 2  | 3   | N/A | N/A | N/A | N/A | N/A | N/A | N/A | N/A | N/A | N/A | N/A | N/A | N/A | N/A | N/A |
|    | BW    | 100 | 102 | 101 | 99  | 100 | 87 | 80  | N/A | N/A | N/A | N/A | N/A | N/A | N/A | N/A | N/A | N/A | N/A | N/A | N/A | N/A | N/A |
| #3 | Score | 0   | 0   | 0   | 0   | 0   | 0  | 1   | 3   | N/A | N/A | N/A | N/A | N/A | N/A | N/A | N/A | N/A | N/A | N/A | N/A | N/A | N/A |
|    | BW    | 100 | 97  | 96  | 97  | 98  | 90 | 85  | 79  | N/A | N/A | N/A | N/A | N/A | N/A | N/A | N/A | N/A | N/A | N/A | N/A | N/A | N/A |
| #4 | Score | 0   | 0   | 0   | 0   | 0   | 3  | N/A | N/A | N/A | N/A | N/A | N/A | N/A | N/A | N/A | N/A | N/A | N/A | N/A | N/A | N/A | N/A |
|    | BW    | 100 | 101 | 102 | 103 | 93  | 84 | N/A | N/A | N/A | N/A | N/A | N/A | N/A | N/A | N/A | N/A | N/A | N/A | N/A | N/A | N/A | N/A |
| #5 | Score | 0   | 0   | 0   | 0   | 0   | 1  | 3   | N/A | N/A | N/A | N/A | N/A | N/A | N/A | N/A | N/A | N/A | N/A | N/A | N/A | N/A | N/A |
|    | BW    | 100 | 100 | 101 | 103 | 100 | 92 | 83  | N/A | N/A | N/A | N/A | N/A | N/A | N/A | N/A | N/A | N/A | N/A | N/A | N/A | N/A | N/A |
| #6 | Score | 0   | 0   | 0   | 0   | 0   | 1  | 3   | N/A | N/A | N/A | N/A | N/A | N/A | N/A | N/A | N/A | N/A | N/A | N/A | N/A | N/A | N/A |
|    | BW    | 100 | 97  | 96  | 98  | 98  | 87 | 79  | N/A | N/A | N/A | N/A | N/A | N/A | N/A | N/A | N/A | N/A | N/A | N/A | N/A | N/A | N/A |
| #7 | Score | 0   | 0   | 0   | 0   | 0   | 1  | 2   | 3   | N/A | N/A | N/A | N/A | N/A | N/A | N/A | N/A | N/A | N/A | N/A | N/A | N/A | N/A |
|    | BW    | 100 | 101 | 101 | 99  | 100 | 90 | 83  | 76  | N/A | N/A | N/A | N/A | N/A | N/A | N/A | N/A | N/A | N/A | N/A | N/A | N/A | N/A |
| #8 | Score | 0   | 0   | 0   | 0   | 0   | 3  | N/A | N/A | N/A | N/A | N/A | N/A | N/A | N/A | N/A | N/A | N/A | N/A | N/A | N/A | N/A | N/A |
|    | BW    | 100 | 93  | 92  | 92  | 87  | 79 | N/A | N/A | N/A | N/A | N/A | N/A | N/A | N/A | N/A | N/A | N/A | N/A | N/A | N/A | N/A | N/A |
